# Supplementary material for: IDegLira Versus Alternative Intensification Strategies in Patients with Type 2 Diabetes Inadequately Controlled on Basal Insulin Therapy
Source: Springer Nature journal article supplement (doi:10.1007/s13300-015-0142-y), 2015-11-18
Supplement: MOESM2 [file 9263394]

## SUPPLEMENTARY MATERIAL

**Figure S1.** Search strategy for identifying relevant trials.

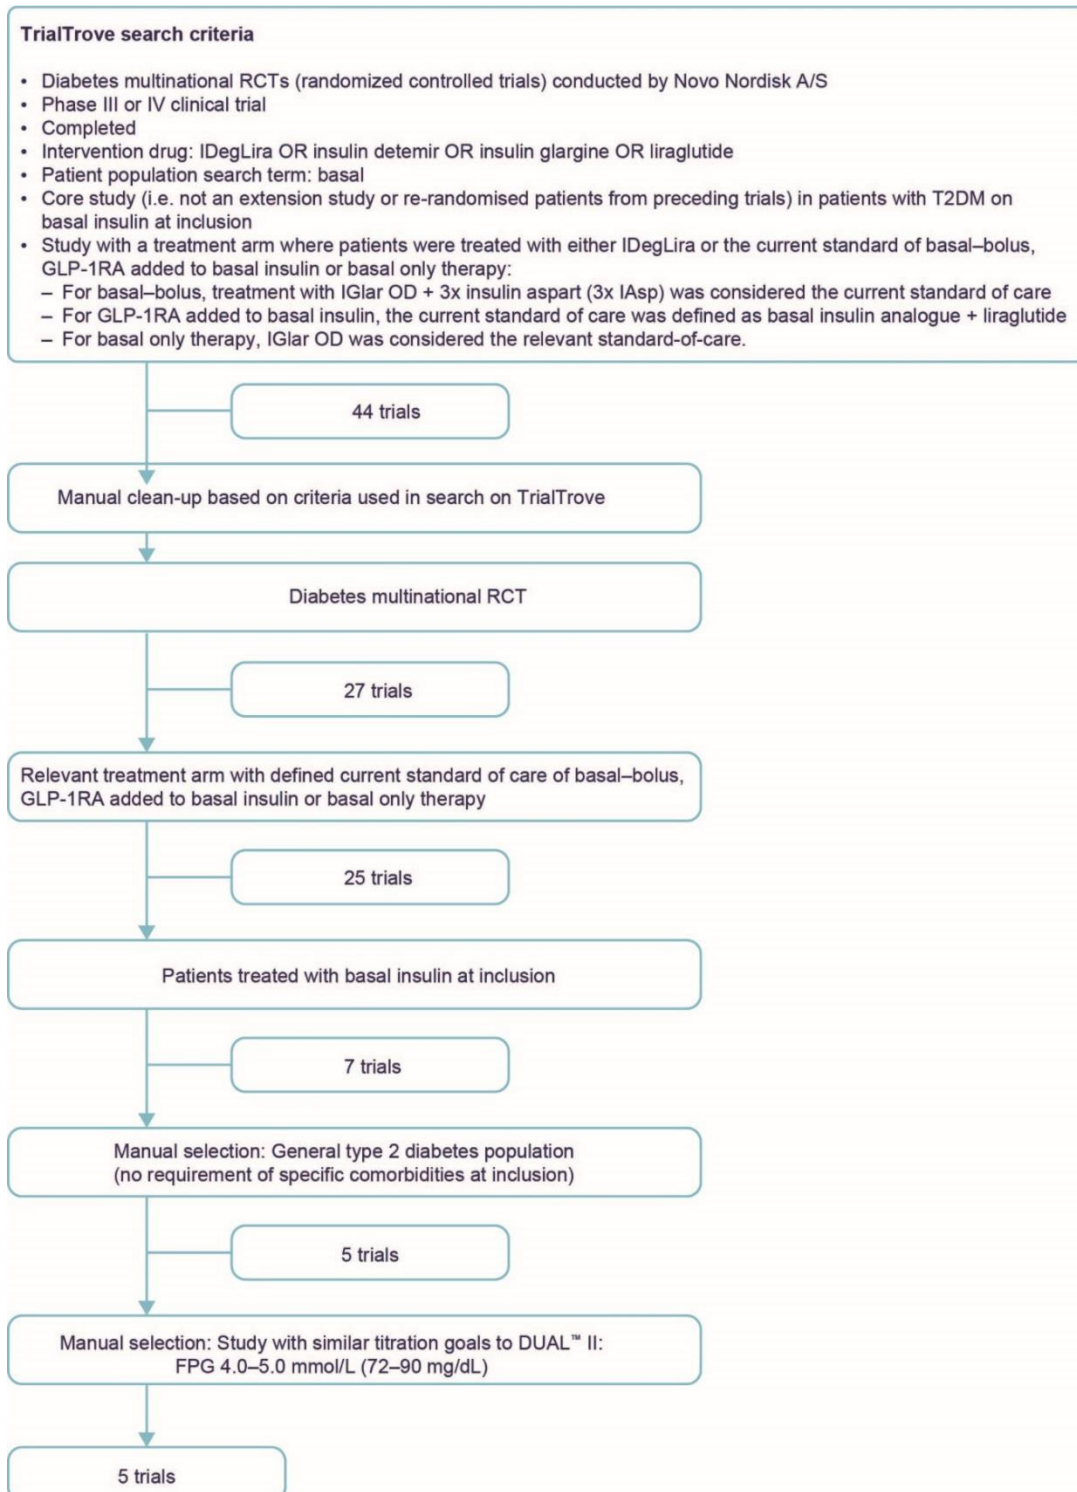

FPG, fasting plasma glucose; GLP-1RA, glucagon-like peptide-1 receptor agonist; IAsp, insulin aspart; IDegLira, insulin degludec/liraglutide; IGlar, insulin glargine; OD, once daily; T2DM, type 2 diabetes mellitus

**Table S1.** The DUAL™ development programme for IDegLira (July 2015) [S1–S6].

| <b>Trial name and registration number</b> | <b>Comparators/description</b>                                                               | <b>Duration</b> | <b>Status</b>                                     |
|-------------------------------------------|----------------------------------------------------------------------------------------------|-----------------|---------------------------------------------------|
| DUAL I<br>NCT01336023                     | IDegLira vs. IDeg and vs. Lira added on to OAD                                               | 26 weeks        | Published in full<br>Gough et al, 2014 [S1]       |
| DUAL I extension<br>NCT01336023           | Extension of DUAL I                                                                          | 52 weeks        | Published in full<br>Gough et al, 2015 [S2]       |
| DUAL II<br>NCT01392573                    | IDegLira vs. IDeg in patients previously treated with basal insulin                          | 26 weeks        | Published in full<br>Buse et al, 2014 [S3]        |
| DUAL III<br>NCT01676116                   | Switch to IDegLira from (daily) GLP-1 receptor agonist therapy vs. unchanged GLP-1RA therapy | 26 weeks        | Published as abstract<br>Linjawi et al, 2015 [S4] |
| DUAL IV<br>NCT01618162                    | IDegLira add-on to SU vs. placebo                                                            | 26 weeks        | Published as abstract<br>Rodbard et al, 2015 [S5] |
| DUAL V<br>NCT01952145                     | Basal insulin optimization vs. IGLar                                                         | 26 weeks        | Published as abstract<br>Buse et al, 2015 [S6]    |
| DUAL V extension<br>NCT02100475           | Extension of DUAL V                                                                          | 52 weeks        | Ongoing                                           |
| DUAL VI<br>NCT02298192                    | Comparison of once-weekly vs. twice-weekly titration of IDegLira                             | 32 weeks        | Ongoing                                           |
| DUAL VII                                  | IDegLira vs. full basal–bolus therapy (IGlar + IAsp)                                         | 26 weeks        | In planning stages                                |

GLP-1, glucagon-like peptide-1; IAsp, insulin aspart; IDeg, insulin degludec; IDegLira, insulin degludec/liraglutide; IGLar, insulin glargine; Lira, liraglutide; OAD, oral antidiabetic drug; SU, sulfonylurea.

### **Supplemental references:**

- S1. Gough S, Bode B, Woo V, et al. Efficacy and safety of a fixed-ratio combination of insulin degludec and liraglutide (IDegLira) compared with its components given alone: results of a phase 3, open-label, randomised, 26-week, treat-to-target trial in insulin-naive patients with type 2 diabetes. *Lancet Diabetes Endocrinol.* 2014;2:885–93.
- S2. Gough S, Bode B, Woo V, et al. One-year efficacy and safety of a fixed combination of insulin degludec and liraglutide in patients with type 2 diabetes: results of a 26-week extension to a 26-week main trial. *Diabetes Obes Metab.* 2015: doi: 10.1111/dom.12498.
- S3. Buse JB, Vilsbøll T, Thurman J, et al; NN9068-3912 (DUAL-II) Trial Investigators. Contribution of liraglutide in the fixed-ratio combination of insulin degludec and liraglutide (IDegLira). *Diabetes Care* 2014;37:2926–33.
- S4. Linjawi S, Bode B, Chaykin L, et al. Efficacy and safety of IDegLira (combination of insulin degludec + liraglutide), in insulin naïve patients with T2D uncontrolled on GLP-1 receptor agonist (GLP-1RA) therapy. *Diabetes.* 2015;64(Suppl. 1):A255 (Abstract 1002-P).
- S5. Rodbard H, Bode B, Harris S, et al. IDegLira in insulin-naïve patients with type 2 diabetes (T2D) inadequately controlled on sulfonylureas (SU) alone or in combination with metformin: The DUAL IV Study. *Diabetes.* 2015;64(Suppl. 1):A255 (Abstract 1003-P).
- S6. Buse J, Pérez Manghi P, Garcia-Hernandez P, et al. Insulin degludec/liraglutide (IDegLira) is superior to insulin glargine (IG) in A1c reduction, risk of hypoglycemia and weight change: DUAL V Study. *Diabetes.* 2015;64(Suppl. 1):A43 (Abstract 166-OR).

**Table S2.** Results from the supplementary analysis: 4-arm model with 210 patients in the basal–bolus arm.

(a) Estimated end-of-treatment HbA<sub>1c</sub> values, changes from baseline to end-of-treatment per treatment arm, and daily basal insulin dose at end-of-treatment, based on ANCOVA model.

|                                           | IDegLira (N = 199)         |                  | GLP-1RA add-on to basal insulin (N = 225) |                 | Basal–bolus with insulin glargine or insulin degludec as basal component (N = 210) |                 | Basal only (up-titrated insulin glargine) (N = 329) |                |
|-------------------------------------------|----------------------------|------------------|-------------------------------------------|-----------------|------------------------------------------------------------------------------------|-----------------|-----------------------------------------------------|----------------|
|                                           | Mean (SD)                  | 95% CI           | Mean (SD)                                 | 95% CI          | Mean (SD)                                                                          | 95% CI          | Mean (SD)                                           | 95% CI         |
| EOT HbA <sub>1c</sub> %                   | 6.75 (0.96)                | [6.61; 6.89]     | 7.09 (0.96)                               | [6.94; 7.24]    | 7.08 (0.96)                                                                        | [6.94; 7.22]    | 7.38 (0.96)                                         | [7.27; 7.48]   |
| Δ HbA <sub>1c</sub> %                     | -1.66 (0.96)               | [-1.80; -1.51]   | -1.32** (0.96)                            | [-1.47; -1.17]  | -1.33** (0.96)                                                                     | [-1.47; -1.19]  | -1.03** (0.96)                                      | [-1.14; -0.92] |
| Δ HbA <sub>1c</sub> mmol/mol <sup>a</sup> | -18 (12)                   | [-20; -17]       | -14** (12)                                | [-16; -13]      | -14** (11)                                                                         | [-16; -13]      | -11** (11)                                          | [-12; -10]     |
| Δ Body weight, kg                         | -2.95(3.78)                | [-3.50; -2.39]   | -3.57 (3.78)                              | [-4.16; -2.98]  | 3.91** (3.78)                                                                      | [3.36; 4.47]    | 1.20** (3.78)                                       | [0.77; 1.62]   |
| Δ BMI (kg/m <sup>2</sup> )                | -1.04 (1.34)               | [-1.23; -0.84]   | -1.29 (1.34)                              | [-1.49; -1.08]  | 1.38** (1.34)                                                                      | [1.19; 1.58]    | 0.43** (1.34)                                       | [0.28; 0.58]   |
| Δ SBP (mmHg)                              | -6.86 (13.20)              | [-8.80; -4.92]   | -4.67 (13.20)                             | [-6.72; -2.63]  | 0.93** (13.20)                                                                     | [-2.85; 1.00]   | -3.49** (13.20)                                     | [-4.97; -2.01] |
| Δ total cholesterol (mg/dL)               | -10.13(30.28)              | [-14.59; -5.67]  | -12.66 (30.28)                            | [-17.37; -7.95] | 1.50** (30.28)                                                                     | [-2.94; 5.94]   | -2.65** (30.28)                                     | [-6.06; 0.77]  |
| Δ LDL cholesterol (mg/dL)                 | -6.85 (23.83)              | [-10.36; -3.34]  | -9.07 (23.83)                             | [-12.79; -5.35] | 0.076** (23.83)                                                                    | [-3.43; 3.58]   | -2.65 (23.83)                                       | [-5.33; 0.04]  |
| Δ HDL cholesterol (mg/dL)                 | 0.52 (6.79)                | [-0.48; 1.52]    | -0.77 (6.79)                              | [-1.83; 0.29]   | 0.79 (6.79)                                                                        | [-0.21; 1.78]   | 1.10 (6.79)                                         | [0.33; 1.86]   |
| Δ triglycerides (mg/dL)                   | -25.74 (103.71)            | [-41.01; -10.47] | -18.99 (103.71)                           | [-35.13; -2.86] | 3.82** (103.71)                                                                    | [-11.39; 19.03] | -3.05* (103.71)                                     | [-14.82; 8.72] |
| EOT daily basal dose [U]                  | 37.27 (30.22) <sup>b</sup> | [ 32.82; 41.71]  | 35.89 (30.22) <sup>c</sup>                | [31.24; 40.55]  | 68.22** (30.22) <sup>d</sup>                                                       | [63.80; 72.64]  | 61.58** (30.22)                                     | [58.17; 64.99] |

Δ, change from baseline; ANCOVA, analysis of covariance; BMI, body mass index; CI, confidence interval; EOT, end-of-treatment; GLP-1RA, glucagon-like peptide-1 receptor agonist; HbA<sub>1c</sub>, glycated hemoglobin; HDL, high-density lipoprotein; IDegLira, insulin degludec/liraglutide; LDL, low-density lipoprotein; SBP, systolic blood pressure; SD, standard deviation.

IDegLira significantly different: \**P* < 0.05, \*\**P* < 0.01 (for exact values see Table 4b). Reported SDs are model based.

<sup>a</sup> Calculated values; <sup>b</sup> Daily GLP-1RA dose at end-of-treatment was 1.34 mg (one dose step of IDegLira = 1 U insulin degludec + 0.036 mg liraglutide); <sup>c</sup> Daily GLP-1RA dose at end-of-treatment was 1.8 mg; <sup>d</sup> Daily bolus dose at end-of-treatment was 57.90 U. Basal/bolus split: 54.1%/45.9%.

(b) Estimated end-of-treatment differences for IDegLira versus comparators and daily basal insulin dose at end-of-treatment, based on ANCOVA model.

|                                             | IDegLira vs. GLP-1RA add-on to basal insulin<br>(N = 199) |                 |         | IDegLira vs. basal-bolus with insulin<br>glargine or insulin degludec as basal<br>component (N = 210) |                  |         | IDegLira vs. basal-only (up-titrated insulin glargine)<br>(N = 329) |                  |         |
|---------------------------------------------|-----------------------------------------------------------|-----------------|---------|-------------------------------------------------------------------------------------------------------|------------------|---------|---------------------------------------------------------------------|------------------|---------|
|                                             | Mean                                                      | 95% CI          | P-value | Mean                                                                                                  | 95% CI           | P-value | Mean                                                                | 95% CI           | P-value |
| Δ HbA <sub>1c</sub> , %                     | -0.34                                                     | [-0.54; -0.13]  | 0.0013  | -0.33                                                                                                 | [-0.52; -0.13]   | 0.0009  | -0.63                                                               | [-0.80; -0.45]   | <0.0001 |
| Δ HbA <sub>1c</sub> , mmol/mol <sup>a</sup> | -4                                                        | [-6; -1]        | 0.0013  | -4                                                                                                    | [-6; -1]         | 0.0009  | -7                                                                  | [-9; -5]         | <0.0001 |
| Δ Body weight, kg                           | 0.63                                                      | [-0.18; 1.44]   | 0.1293  | -6.86                                                                                                 | [-7.62; -6.09]   | <0.0001 | -4.14                                                               | [-4.84; -3.44]   | <0.0001 |
| Δ BMI (kg/m <sup>2</sup> )                  | 0.25                                                      | [-0.04; 0.54]   | 0.0855  | -2.42                                                                                                 | [-2.69; -2.15]   | <0.0001 | -1.47                                                               | [-1.72; -1.22]   | <0.0001 |
| Δ SBP (mmHg)                                | -2.19                                                     | [-5.02; 0.64]   | 0.1291  | -5.94                                                                                                 | [-8.61; -3.26]   | <0.0001 | -3.37                                                               | [-5.82; -0.91]   | 0.0072  |
| Δ total cholesterol<br>(mg/dL)              | 2.53                                                      | [-3.97; 9.02]   | 0.4453  | -11.63                                                                                                | [-17.79; -5.48]  | 0.0002  | -7.48                                                               | [-13.15; -1.82]  | 0.0096  |
| Δ LDL cholesterol<br>(mg/dL)                | 2.22                                                      | [-2.90; 7.34]   | 0.3956  | -6.93                                                                                                 | [-11.78; -2.08]  | 0.0052  | -4.21                                                               | [-8.65; 0.24]    | 0.0638  |
| Δ HDL cholesterol<br>(mg/dL)                | 1.29                                                      | [-0.17; 2.75]   | 0.0834  | -0.26                                                                                                 | [-1.64; 1.11]    | 0.7075  | -0.58                                                               | [-1.84; 0.69]    | 0.3727  |
| Δ Triglycerides (mg/dL)                     | -6.75                                                     | [-29.00; 15.50] | 0.5519  | -29.56                                                                                                | [-50.59; -8.53]  | 0.0059  | -22.69                                                              | [-42.14; -3.24]  | 0.0222  |
| EOT daily basal dose<br>[U]                 | 1.37                                                      | [-5.08; 7.82]   | 0.6767  | -30.95                                                                                                | [-37.08; -24.83] | <0.0001 | -24.32                                                              | [-29.95; -18.68] | <0.0001 |

Δ, change from baseline; ANCOVA, analysis of covariance; BMI, body mass index; CI, confidence interval; EOT, end-of-treatment; GLP-1RA, glucagon-like peptide-1 receptor agonist; HbA<sub>1c</sub>, glycated hemoglobin; HDL, high-density lipoprotein; IDegLira, insulin degludec/liraglutide; LDL, low-density lipoprotein; SBP, systolic blood pressure.

<sup>a</sup> Calculated values.

**Table S3.** Observed outcomes/changes from baseline in each of the treatment arms contributing to the pooled analysis and supplementary analysis.

|                                                     | <b>IDegLira<br/>(N = 199)</b> | <b>Liraglutide 1.8 mg<br/>added to basal<br/>insulin (N = 225)</b> | <b>Basal–bolus with<br/>insulin glargine as<br/>basal component<br/>(N = 56)</b> | <b>Basal–bolus with insulin<br/>glargine or insulin degludec<br/>as basal component<br/>(N = 210)</b> | <b>Up-titrated<br/>insulin glargine<br/>(N = 329)</b> |
|-----------------------------------------------------|-------------------------------|--------------------------------------------------------------------|----------------------------------------------------------------------------------|-------------------------------------------------------------------------------------------------------|-------------------------------------------------------|
| EOT HbA <sub>1c</sub> (%)                           | 6.85 (0.99)                   | 6.95 (1.02)                                                        | 7.04 (1.38)                                                                      | 7.02 (1.18)                                                                                           | 7.37 (0.98)                                           |
| Δ HbA <sub>1c</sub> (%)                             | -1.90 (1.09)                  | -1.25 (1.00)                                                       | -1.43 (1.14)                                                                     | -1.34 (1.18)                                                                                          | -0.99 (1.02)                                          |
| Δ HbA <sub>1c</sub> (mmol/mol) <sup>a</sup>         | -21 (12)                      | -14 (11)                                                           | -16 (12)                                                                         | -15 (13)                                                                                              | -11 (11)                                              |
| Δ Weight (kg)                                       | -2.68 (3.68)                  | -3.29 (3.55)                                                       | +4.24 (4.79)                                                                     | +4.08 (5.23)                                                                                          | +1.04 (3.03)                                          |
| Δ BMI (kg/m <sup>2</sup> )                          | -0.94 (1.29)                  | -1.20 (1.24)                                                       | +1.51 (1.71)                                                                     | +1.44 (1.86)                                                                                          | +0.38 (1.10)                                          |
| Δ SBP (mmHg)                                        | -5.40 (14.11)                 | -5.40 (14.40)                                                      | +3.29 (13.98)                                                                    | -0.05 (16.56)                                                                                         | -3.36 (15.52)                                         |
| Δ Total cholesterol (mg/dL)                         | -11.79 (33.54)                | -12.35 (36.12)                                                     | -2.68 (35.65)                                                                    | +3.66 (34.32)                                                                                         | -1.44 (28.17)                                         |
| Δ HDL cholesterol (mg/dL)                           | +1.36 (6.91)                  | -1.80 (7.94)                                                       | +1.21 (6.34)                                                                     | +1.53 (7.06)                                                                                          | +1.51 (7.08)                                          |
| Δ LDL cholesterol (mg/dL)                           | -8.62 (27.22)                 | -8.61 (25.73)                                                      | -1.30 (31.13)                                                                    | +1.71 (27.21)                                                                                         | -2.90 (25.21)                                         |
| Δ Triglycerides (mg/dL)                             | -29.47 (140.32)               | -13.48 (82.74)                                                     | -14.32 (78.31)                                                                   | +2.09 (138.60)                                                                                        | +0.96 (60.17)                                         |
| EOT daily basal insulin (U)                         | 44.82 (9.41)                  | 43.19 (31.11)                                                      | 67.65 (42.46)                                                                    | 71.69 (47.28)                                                                                         | 56.88 (34.34)                                         |
| EOT daily bolus insulin (U)                         | -                             | -                                                                  | 58.09 <sup>b</sup>                                                               | 60.82 <sup>c</sup>                                                                                    | -                                                     |
| Overall confirmed hypoglycemia (events/100 PYE)     | 153                           | 126                                                                | 1539                                                                             | 1072                                                                                                  | 340                                                   |
| Severe hypoglycemia event rate (events/100 PYE)     | 1                             | 0                                                                  | 4                                                                                | 4                                                                                                     | 4                                                     |
| Non-severe hypoglycemia event rate (events/100 PYE) | 152                           | 126                                                                | 1535                                                                             | 1068                                                                                                  | 336                                                   |

Δ, change from baseline; BMI, body mass index; EOT, end-of-treatment; HbA<sub>1c</sub>, glycated hemoglobin; HDL, high-density lipoprotein; IDegLira, insulin degludec/liraglutide; LDL, low-density lipoprotein; PYE, patient-year of exposure; SBP, systolic blood pressure.

<sup>a</sup> Calculated values; <sup>b</sup> Basal/bolus split as % at end of treatment: 53.8/46.2; <sup>c</sup> Basal/bolus split as % at end of treatment: 54.1/45.9.

**Table S4.** Results from the supplementary analysis: 4-arm model with 210 patients in the basal–bolus arm.

(a) Estimated rates of confirmed hypoglycemia for IDegLira versus comparators, based on a negative binomial model.

|                                | IDegLira (N = 199) |                 | GLP-1RA add-on to basal insulin (N = 225) |                 | Basal–bolus with insulin glargine or insulin degludec as basal component (N = 210) |                  | Basal oral (up-titrated insulin glargine) (N = 329) |                  |
|--------------------------------|--------------------|-----------------|-------------------------------------------|-----------------|------------------------------------------------------------------------------------|------------------|-----------------------------------------------------|------------------|
|                                | Events/100 PYE     | 95% CI          | Events/100 PYE                            | 95% CI          | Events/100 PYE                                                                     | 95% CI           | Events/100 PYE                                      | 95% CI           |
| Overall confirmed hypoglycemia | 125.9              | [95.45; 166.11] | 124.7                                     | [92.74; 167.59] | 797.9**                                                                            | [637.47; 998.68] | 289.0**                                             | [238.40; 350.24] |
| Severe hypoglycemia            | 0.8                | [0.10; 6.71]    | NA                                        | NA              | 2.9                                                                                | [1.01; 8.02]     | 3.5                                                 | [1.41; 8.82]     |
| Non-severe hypoglycemia        | 125.1              | [94.68; 165.15] | 124.5                                     | [92.52; 167.44] | 794.6**                                                                            | [634.32; 995.44] | 285.5 **                                            | [235.31; 346.46] |

CI, confidence interval; GLP-1RA, glucagon-like peptide-1 receptor agonist; IDegLira, insulin degludec/liraglutide; PYE, patient-year of exposure.

IDegLira significantly different: \*\* $P < 0.01$ .

NA, not applicable: could not be estimated as no severe hypoglycemic events were observed with GLP-1RA add-on to basal insulin.

Confirmed hypoglycemia was defined as the occurrence of severe episodes (i.e. requiring assistance), or episodes in which plasma glucose concentration (confirmed by self-monitored blood glucose) was less than 3.1 mmol/L (56 mg/dL), irrespective of symptoms.

(b) Estimated rate ratios for confirmed hypoglycemia, based on a negative binomial model.

|                                | IDegLira vs. GLP-1RA add-on to basal insulin |              |         | IDegLira vs. basal–bolus with insulin glargine or insulin detemir as basal component |              |         | IDegLira vs. basal-only (up-titrated insulin glargine) |              |         |
|--------------------------------|----------------------------------------------|--------------|---------|--------------------------------------------------------------------------------------|--------------|---------|--------------------------------------------------------|--------------|---------|
|                                | Rate ratio                                   | 95% CI       | P-value | Rate ratio                                                                           | 95% CI       | P-value | Rate ratio                                             | 95% CI       | P-value |
| Overall confirmed hypoglycemia | 1.01                                         | [0.68; 1.51] | 0.96    | 0.16                                                                                 | [0.11; 0.22] | <0.0001 | 0.44                                                   | [0.31; 0.61] | <0.0001 |
| Severe hypoglycemia            | NA                                           | NA           | NA      | 0.29                                                                                 | [0.03; 2.72] | 0.28    | 0.24                                                   | [0.03; 2.21] | 0.21    |
| Non-severe hypoglycemia        | 1.00                                         | [0.67; 1.50] | 0.98    | 0.16                                                                                 | [0.11; 0.22] | <0.0001 | 0.44                                                   | [0.31; 0.61] | <0.0001 |

CI, confidence interval; GLP-1RA, glucagon-like peptide-1 receptor agonist; IDegLira, insulin degludec/liraglutide.

NA, not applicable: could not be estimated as no severe hypoglycemic events were observed with GLP-1RA add-on to basal insulin.

**Table S5.** Results from the supplementary analysis: 4-arm model with 210 patients in the basal–bolus arm.

(a) Estimated responder rates per treatment arm, based on a logistic regression model.

|                                                                 | IDegLira<br>(N = 199) | GLP-1RA add-<br>on to basal<br>insulin<br>(N = 225) | Basal–bolus<br>(N = 210) | Basal only<br>(glargine or<br>degludec)<br>(N = 329) |
|-----------------------------------------------------------------|-----------------------|-----------------------------------------------------|--------------------------|------------------------------------------------------|
| $\Delta$ HbA <sub>1c</sub> in all subjects, %                   | -1.66                 | -1.32                                               | -1.33                    | -1.03                                                |
| $\Delta$ HbA <sub>1c</sub> in all subjects, mmol/mol            | -18                   | -14                                                 | -14                      | -11                                                  |
| HbA <sub>1c</sub> <7.0% (53 mmol/mol)                           | 64.5%                 | 46.9%                                               | 52.8%                    | 32.5%                                                |
| HbA <sub>1c</sub> <7.0% without hypoglycemia                    | 45.0%                 | 35.0%                                               | 5.40%                    | 16.0%                                                |
| HbA <sub>1c</sub> <7.0% without hypoglycemia and no weight gain | 39.3%                 | 32.9%                                               | 0.9%                     | 7.7%                                                 |

$\Delta$ , change from baseline; GLP-1RA, glucagon-like peptide-1 receptor agonist; HbA<sub>1c</sub>, glycated hemoglobin; IDegLira, insulin degludec/liraglutide. Rates are shown as percentage of patients, except for HbA<sub>1c</sub> changes.

(b) Estimated odds ratios for responder rates for IDegLira versus comparators in all subjects, based on a logistic regression model.

| In all subjects                                                 | IDegLira vs. GLP-1RA add-on to basal insulin |               |         | IDegLira vs. basal–bolus with insulin glargine as basal component |                  |         | IDegLira vs. basal-only (up-titrated insulin glargine) |                |         |
|-----------------------------------------------------------------|----------------------------------------------|---------------|---------|-------------------------------------------------------------------|------------------|---------|--------------------------------------------------------|----------------|---------|
|                                                                 | Odds ratio                                   | 95% CI        | P-value | Odds ratio                                                        | 95% CI           | P-value | Odds ratio                                             | 95% CI         | P-value |
| HbA <sub>1c</sub> <7.0% (53 mmol/mol)                           | 2.06                                         | [1.30 ; 3.27] | 0.0021  | 1.63                                                              | [1.05 ; 2.51]    | 0.028   | 3.78                                                   | [2.51 ; 5.71]  | <0.0001 |
| HbA <sub>1c</sub> <7.0% without hypoglycemia                    | 1.52                                         | [0.95 ; 2.44] | 0.084   | 14.26                                                             | [7.22 ; 28.13]   | <0.0001 | 4.32                                                   | [2.75 ; 6.78]  | <0.0001 |
| HbA <sub>1c</sub> <7.0% without hypoglycemia and no weight gain | 1.32                                         | [0.80 ; 2.20] | 0.28    | 71.53                                                             | [16.88 ; 303.21] | <0.0001 | 7.78                                                   | [4.54 ; 13.33] | <0.0001 |

CI, confidence interval; GLP-1RA, glucagon-like peptide-1 receptor agonist; HbA<sub>1c</sub>, glycated hemoglobin; IDegLira, insulin degludec/liraglutide.
